# Supplementary material for: Modeling the Dynamic of Multi-Wave Diseases: The Model of Hand, Foot and Mouth Disease
Source: Preprints.org preprint supplement (doi:10.20944/preprints202407.0404.v1), 2024-07-04
Supplement: Supplementary file 1 [file supplementary]

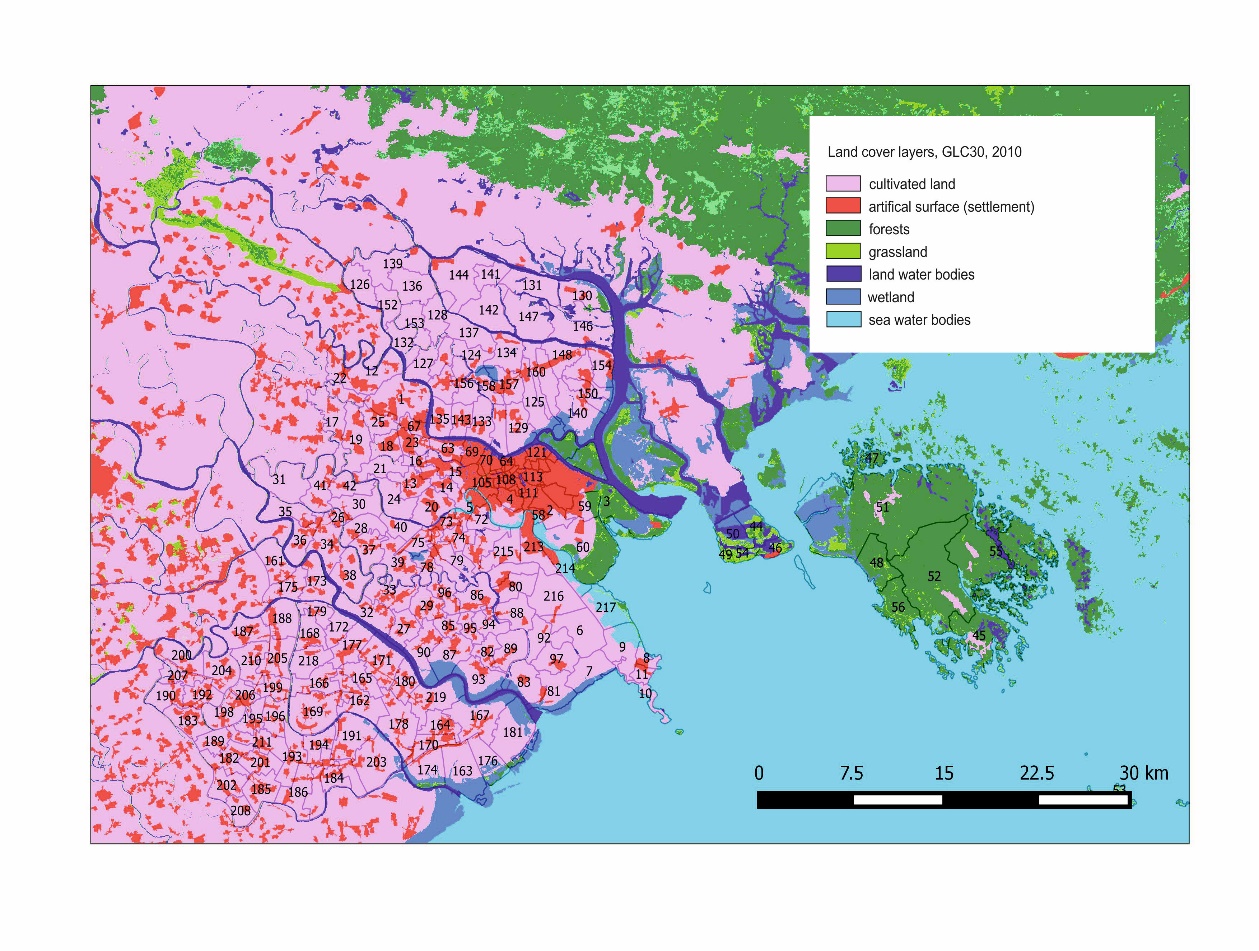


**Figure S1.** Land cover for Hải Phòng District. Red. Urban areas. Artificial surfaces growth between 2000-2010 is in pink. Resolution 30x30m. Figure 1 in grayscale has been superimposed on the map.


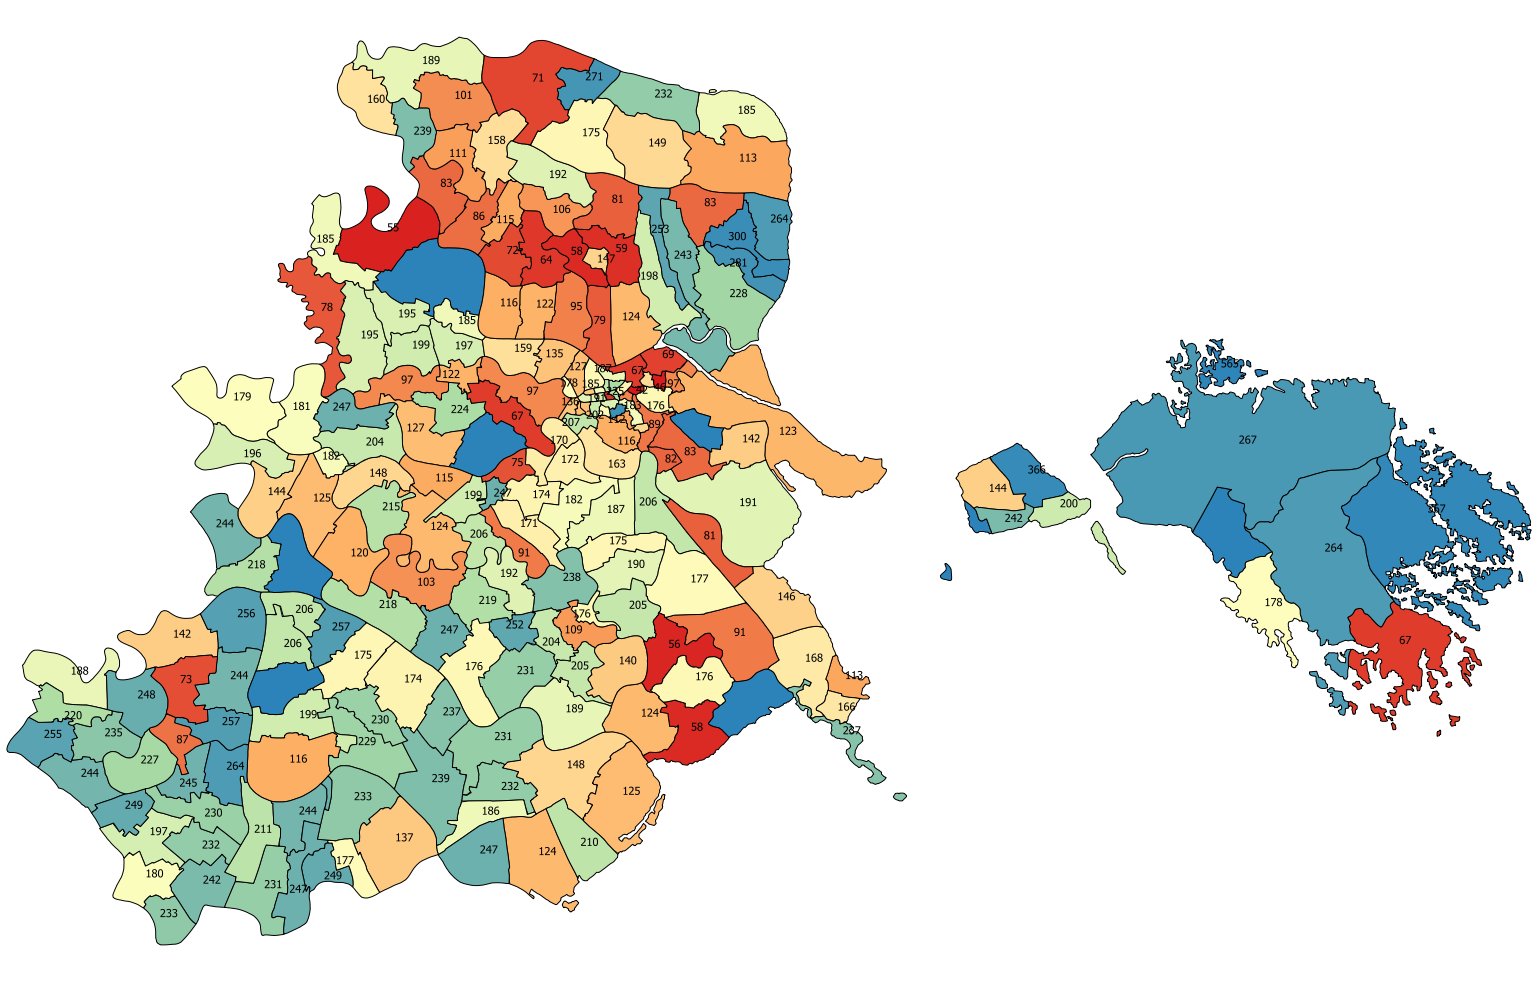


**Figure S2.** Occurrence of HFMD index cases (t0) in each commune of the Hải Phòng region. Colors represent interval of occurrence of the index case in each commune. Red is for the short time t0 and blue for a longer time. HFMD started in the center of Hải Phòng City, then spread towards north west and after south west. Numbers represent Communes ID as given in supplementary Table 2.

**Figure S3.** Monthly distribution of HFMD patients per district of the Hải Phòng region.Level 1 correspond to non-severe cases according to guidelines from the Vietnamese Ministry of Health. Patients present only mouth ulcers and/or skin lesions. Higher level patients have additions symptoms. Patients at level 2b any higher are considered as severe cases in the present study (see legend of supplementary Table 1 for severity level definition).

**Video S1.** Local heterogeneity of the epidemic.This film summarizes the number of cases over time in each commune (<https://filesender.renater.fr/?s=download&token=d75a1140-63fc-4df8-bb9a-ab20f19ee067>). The EMD (Earth Mother Distance) method was used to compare case distribution between communes.
